# Supplementary material
Source: MDPI journal article supplement (https://www.mdpi.com/2073-4395/14/5/988)
Supplement: s1 [file s1]

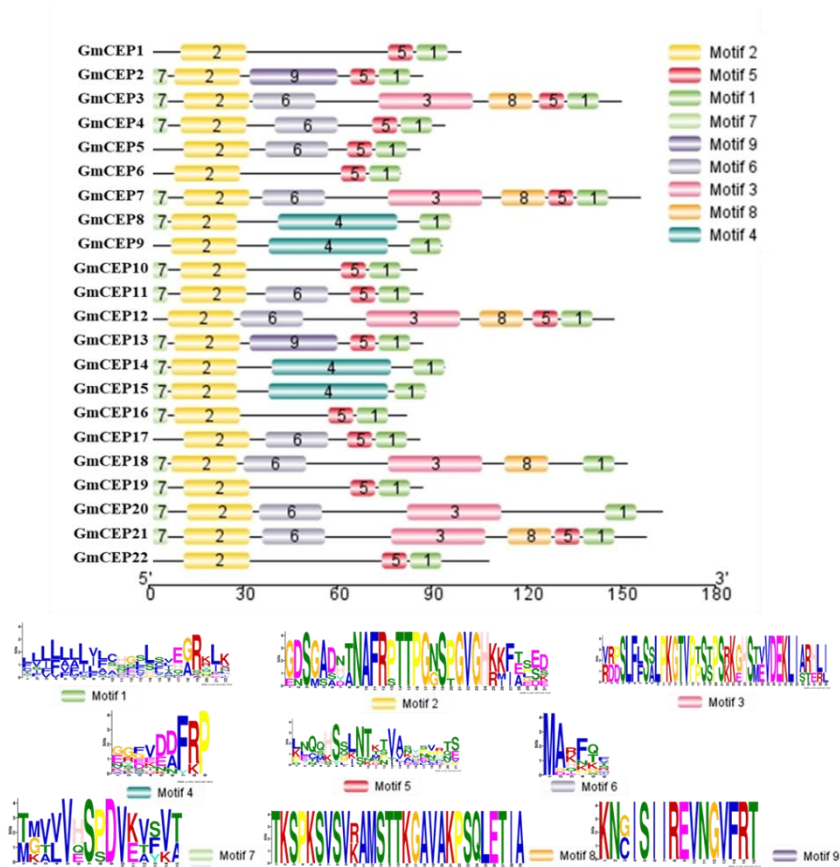

**Figure S1.** Motifs analysis of GmCEPs. Each block represented the position and strength of a motif. The blocks of GmCEPs motif were predicted using MEME. The motif sequence were listed in lower panel.

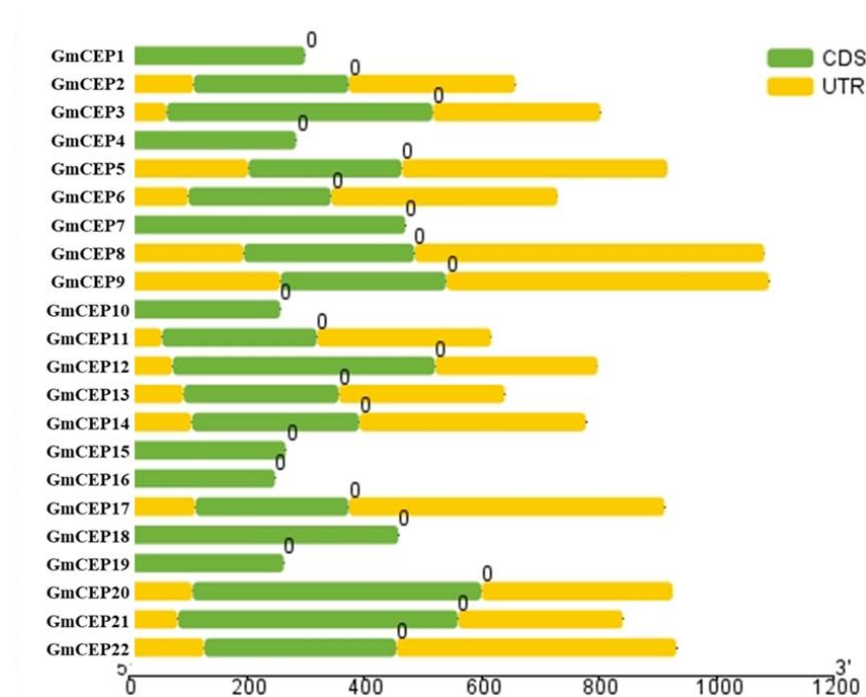

**Figure S2.** Gene structure of 22 *GmCEP* genes. The gene structure information of *GmCEPs* were obtained through gff file of soybean, the diagram was constructed by Tbtools software.

**A**

Target-1

```

ATGGGCCGTCTCACCACATTTGGTTTCTCTTGCACCTCTGTTTTTGTCCCATGAAGTACTCGGTAGTGAGGGGAAGGA
ATTGAGACATACCATTCAATCACCAGATGCTACCAAAGCAATGAGCATTGCAACAAAAAGTGCTAATGTCATCCCAAC
CTACCGTAGCATTAGAAGCCTAGCGGGAGATGTTGAAGCTTTAGGCCTACAACCTCTGGCCACAGTCCTGGAGTTGGC
CATTAAT
  
```

Target-2

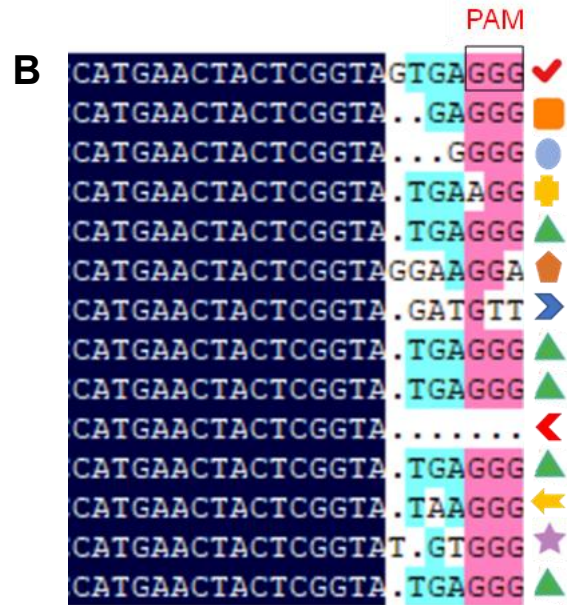

**Figure S3.** Validation of the mutation of *GmCEP6*-edited hairy roots. (A) Sequence of a region of soybean *GmCEP6* with two target sites indicated. (B) Alignment of sequences of target-1 mutated alleles identified from cloned PCR fragments from *crispr cas9 GmCEP6* (KO) transgenic root lines. Highlighting blue denotes the degree of homology of the aligned fragments, and only aligned regions of interest are displayed. Each trait represents a different mutation type. The most mutation was a base shift, represented by a green triangle, with a total of 5 (n=13).

**Table S1.** Primer sequences used in this study.

| <b>Primer Name</b>        | <b>Sequence (5'-3')</b>              | <b>Purpose</b>      |
|---------------------------|--------------------------------------|---------------------|
| <b>GmCEP6-qRT-F</b>       | ATGGGCCGTCTCACCCACATTTG              | qRT PCR             |
| <b>GmCEP6-qRT-R</b>       | ATGGCCAACCTCCAGGACTG                 | qRT PCR             |
| <b>GmCYP2-qRT-F</b>       | CGGGACCAGTGTGCTTCTTCA                | qRT PCR             |
| <b>GmCYP2-qRT-R</b>       | CCCCTCCACTACAAAGGCTCG                | qRT PCR             |
| <b>GmNIN1a-qRT-F</b>      | CATCTTGAGCCTCTACCACC                 | qRT PCR             |
| <b>GmNIN1a-qRT-R</b>      | GCTTTGACTCTAAAAGTGCCGG               | qRT PCR             |
| <b>GmENOD40-1-qRT-F</b>   | TGGACAACACCCTCTAAACCA                | qRT PCR             |
| <b>GmENOD40-1-qRT-R</b>   | GTGAGGGAGTGTGAGGAGTGA                | qRT PCR             |
| <b>GmNSP1-qRT-F</b>       | GGTCTATAACTTTTGCTTCCAGC              | qRT PCR             |
| <b>GmNSP1-qRT-R</b>       | CAGTGTCTTCGCCAAGAAGCTTG              | qRT PCR             |
| <b>GmHAP2-1-qRT-F</b>     | CACGCCATCTACATGCGAC                  | qRT PCR             |
| <b>GmHAP2-1-qRT-R</b>     | ACTGGAATTGTCGGCCGCTG                 | qRT PCR             |
| <b>GmHAP2-2-qRT-F</b>     | GGAGTGCCTTAGGATCTCAACC               | qRT PCR             |
| <b>GmHAP2-2-qRT-R</b>     | TACCGCTTGCTTACCGGCTG                 | qRT PCR             |
| <b>GmCEP6-Promoter-F</b>  | GGGGACAAGTTTGTACAAAAAAGCAGGCTTCATGC  | Vector construction |
| <b>GmCEP6-Promoter-R</b>  | ACTGGCACGGAGATTTAG                   | Vector construction |
| <b>GmCEP6-hairy-OE-F</b>  | GGGGACCACTTTGTACAAGAAAGCTGGGTCTGGGTG | Vector construction |
| <b>GmCEP6-hairy-OE-R</b>  | TTTAGGCAAGGA                         | Vector construction |
| <b>GmCEP6-Crispr-BsF1</b> | GGGGACAAGTTTGTACAAAAAAGCAGGCTTCATGG  | Vector construction |
| <b>GmCEP6-Crispr-BsR1</b> | GCCGTCTCACCCACATTTG                  | Vector construction |
| <b>GmCEP6-Crispr-BsR1</b> | GGGGACCACTTTGTACAAGAAAGCTGGGTCATGGCC | Vector construction |
| <b>GmCEP6-Crispr-BsR1</b> | AACTCCAGGACTG                        | Vector construction |
| <b>GmCEP6-Crispr-BsR1</b> | ATATATGGTCTCGATTGATGAACTACTCGGTAGTGA | Vector construction |
| <b>GmCEP6-Crispr-BsR1</b> | GTT                                  | Vector construction |
| <b>GmCEP6-Crispr-BsR1</b> | ATTATTGGTCTCGAAACCTAGGCTTCTAATGCTACG | Vector construction |
| <b>GmCEP6-Crispr-BsR1</b> | CAA                                  | Vector construction |
| <b>GmCEP6-Crispr-BsR1</b> | TGATGAACTACTCGGTAGTGAGTTTTAGAGCTAGAA | Vector construction |

|                   |                                      |              |
|-------------------|--------------------------------------|--------------|
| <b>Crispr-F01</b> | ATAGC                                | construction |
| <b>GmCEP6-</b>    | AACCTAGGCTTCTAATGCTACGCAATCTCTTAGTCG | Vector       |
| <b>Crispr-R01</b> | ACTCTAC                              | construction |
